# Supplementary material for: Drivers of the reduction in childhood diarrhea mortality 1980-2015 and interventions to eliminate preventable diarrhea deaths by 2030
Source: PubMed Central journal article supplement (PMC6815873; doi:10.7189/jogh.09.020801), 2019-12
Supplement: jogh-09-020801-s001.pdf [file jogh-09-020801-s001.pdf]

## Web Appendix

### Determinants of the reduction in Childhood Diarrhea Mortality 1980-2015 and Interventions to Eliminate Preventable Diarrhea Deaths by 2030

Robert Black, Olivier Fontaine, Laura Lamberti, Maharaj Bhan, Luis Huicho, Shams El Arifeen, Honorati Masanja, Christa Fischer Walker, Tigest Ketsela Mengestu, Luwei Pearson, Mark Young, Nosa Orobato, Yue Chu, Bianca Jackson, Masee Bateman, Neff Walker, Michael Merson

#### **Table of Contents**

|                                                                                                                                                                |    |
|----------------------------------------------------------------------------------------------------------------------------------------------------------------|----|
| Webappendix Figure 1: The causal pathways between interventions and risk factors and neonatal mortality, as modeled in <i>LiST</i> .....                       | 2  |
| Webappendix Figure 2: The causal pathways between interventions and risk factors and post-neonatal child mortality, as modeled in <i>LiST</i> .....            | 3  |
| Webappendix Figure 3: Global trend of under five mortality and diarrhea-specific mortality rates, 1960s-2010s.....                                             | 4  |
| Webappendix Figure 4: Countries that would reduce diarrhea mortality to <1 death per 1000 live births in three scenarios .....                                 | 5  |
| Webappendix Table 1: Data source documentation.....                                                                                                            | 6  |
| Webappendix Table 2: Average coverage/prevalence of interventions in 50 countries included in analysis, weighted by number of live births in each country..... | 7  |
| Webappendix Table 3: Description of the interventions and risk factors included in each universal coverage scale-up scenario.....                              | 8  |
| Webappendix Table 4: Number of diarrhea deaths among children under-five for 87 LMIC in 1980 and 2015.....                                                     | 9  |
| Webappendix Table 5: Comparison of change in DSMR calculated from mortality trends versus trends that calculated from <i>LiST</i> projections in 50 LMIC.....  | 12 |
| Webappendix Table 6: The impact on diarrhea-specific mortality (DSMR) if increased coverage of different packages of interventions is achieved by 2030.....    | 14 |
| Webappendix Table 7: The percent of child lives saved in 2030 attributable to each intervention in the three scale-up scenarios.....                           | 16 |
| Webappendix Table 8: Countries that would reduce diarrhea mortality to <1 death per 1000 live births in three scenarios.....                                   | 17 |

## Webappendix Figure 1

The causal pathways between interventions and risk factors and neonatal mortality, as modeled in *LiST*.

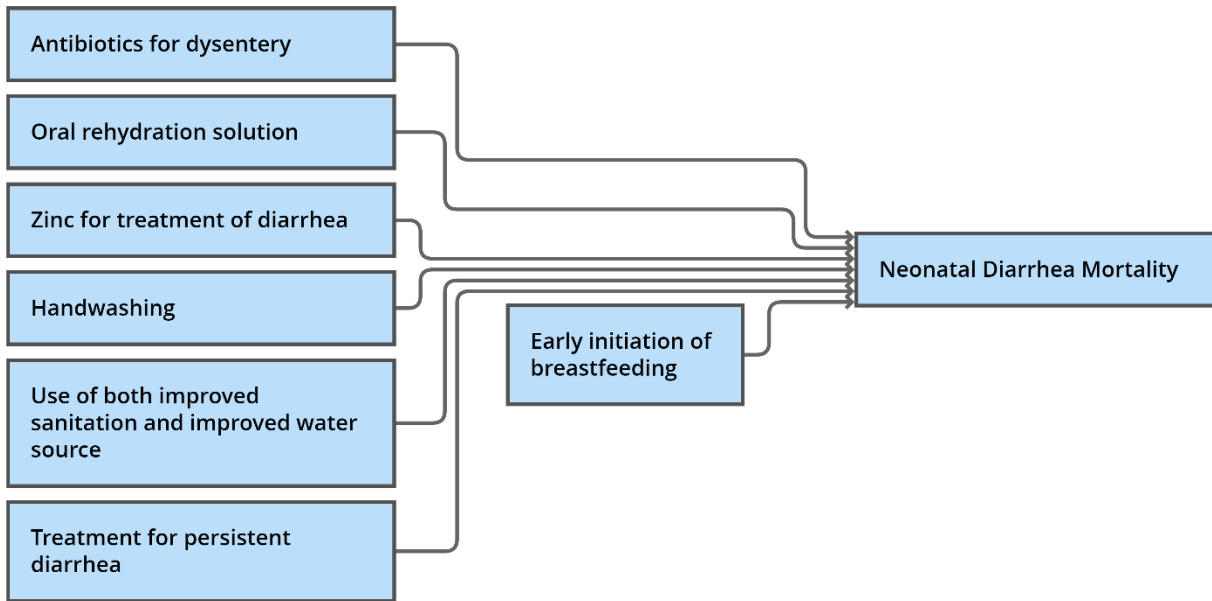

## Webappendix Figure 2

The causal pathways between interventions and risk factors and post-neonatal child mortality, as modeled in *LiST*.

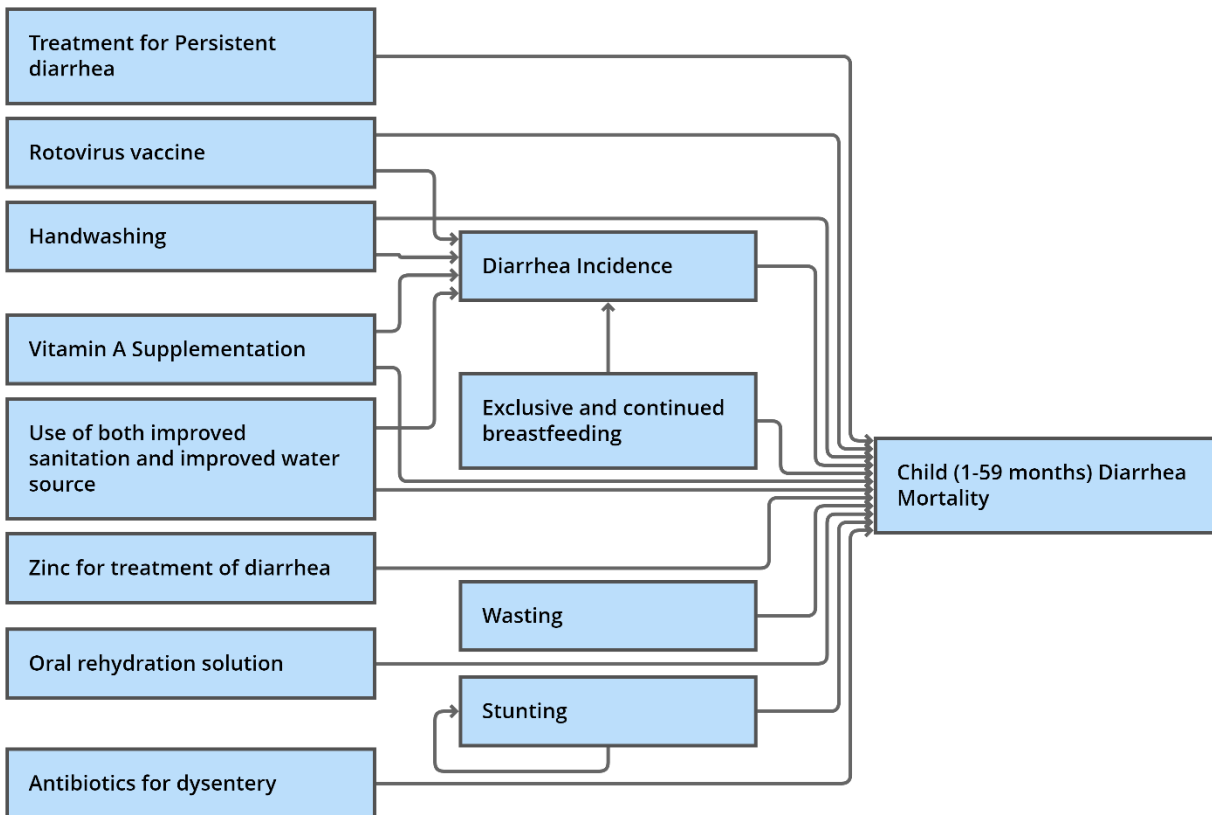

<sup>1</sup> The following interventions also have causal linkages to diarrhea mortality in children aged 1-59 months through risk factors, and can be modelled in *LiST*, but were not included in the present analyses because of a lack of coverage data: treatment for severe acute malnutrition (SAM), treatment for moderate acute malnutrition (MAM), balanced energy supplementation in pregnancy, intermittent preventive treatment of malaria in pregnancy (IPTp), insecticide-treated bed nets (ITN)/indoor residual spraying (IRS) for prevention of malaria, multiple micronutrient supplementation in pregnancy, complementary feeding, kangaroo mother care (KMC). For the full visualization of all causal linkages in *LiST*, including all interventions that have linkages to diarrhea mortality in children, please see <http://listvisualizer.org/>.

Webappendix Figure 3

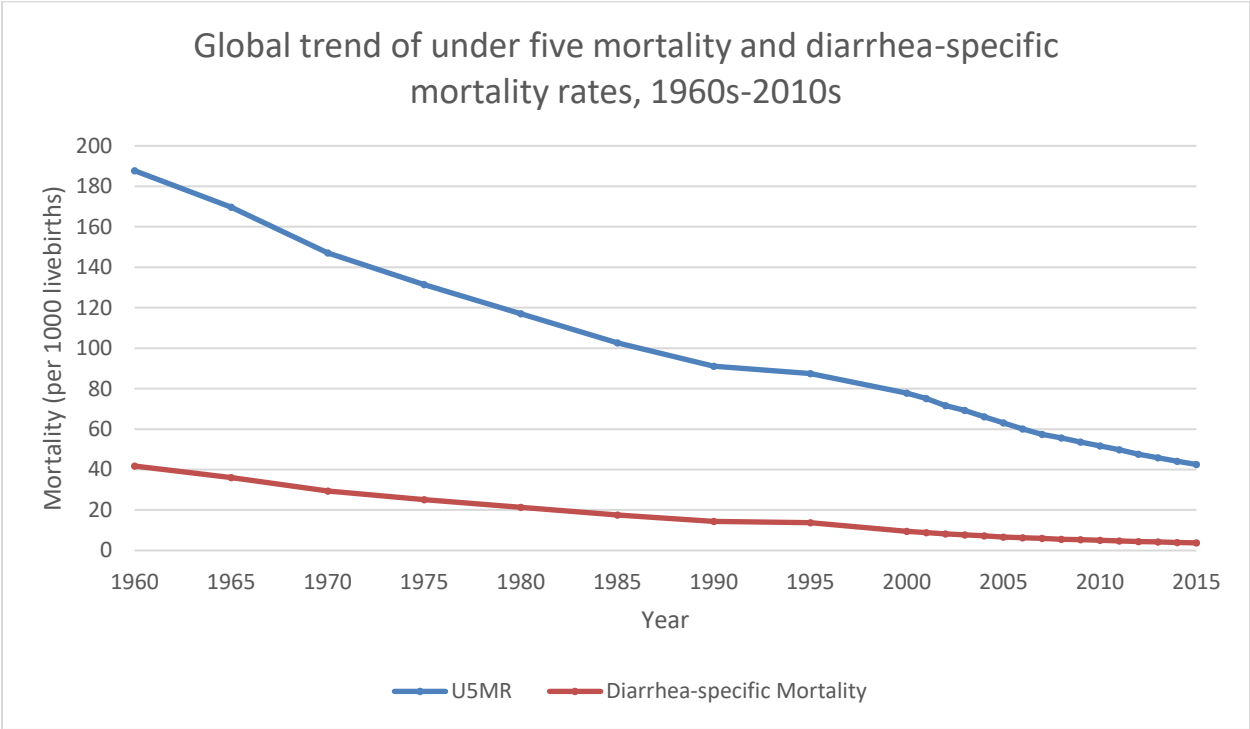

# Webappendix Figure 4

Countries that would reduce diarrhea mortality to <1 death per 1000 live births in three scenarios

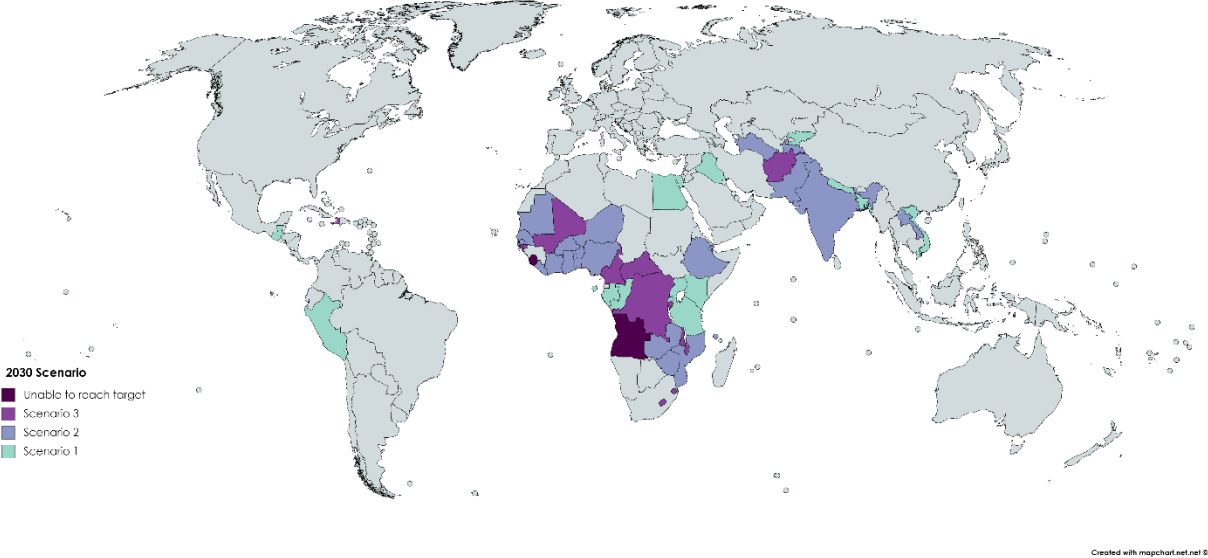

## Webappendix Table 1

### Data source documentation

| Indicator                                                                             | Source(s)                                                                                                                                                                                                                                                                                     | Assumptions                                                                                                                                                                                                                     |
|---------------------------------------------------------------------------------------|-----------------------------------------------------------------------------------------------------------------------------------------------------------------------------------------------------------------------------------------------------------------------------------------------|---------------------------------------------------------------------------------------------------------------------------------------------------------------------------------------------------------------------------------|
| Neonatal, infant and under-five mortality rates                                       | United Nations Population Division                                                                                                                                                                                                                                                            | None                                                                                                                                                                                                                            |
| Height-for-age Z score (HAZ) distribution data, segregated by age group               | Overall stunting rates (% of children under five greater than -2 SD below reference population mean and % of children under five greater than -3SD below reference population mean) for year 1985 <sup>58</sup><br><br>When available, data from nationally representative surveys were used* | Modeling in LiST required Stunting distribution pattern by age. Matched stunting distribution by age from earliest DHS, or similar survey. Assumed 1980 stunting distribution equal to 1985 stunting distribution <sup>58</sup> |
| Weight-for-age Z score (WHZ) distribution data, segregated by age group               | Nationally representative surveys*                                                                                                                                                                                                                                                            | Assumed 1980 coverage equal to earliest measured from nationally representative surveys. For subsequent years, linear changes were assumed between measured values from nationally representative surveys                       |
| Cause of death structure (i.e. percentage of deaths due to each major cause of death) | Maternal Child Epidemiology Estimation                                                                                                                                                                                                                                                        | None                                                                                                                                                                                                                            |
| Antibiotics for dysentery                                                             | Nationally representative surveys*                                                                                                                                                                                                                                                            | Coverage equal to 0% in year 1960 and linear scale up until earliest measured data                                                                                                                                              |
| Early Initiation of breastfeeding                                                     | Demographic and Health Surveys, Multiple Indicator Cluster Surveys, other national surveys                                                                                                                                                                                                    | Assumed 1980 coverage equal to earliest measured                                                                                                                                                                                |
| Hand washing with soap                                                                | Joint Monitoring Programme                                                                                                                                                                                                                                                                    | Assumed coverage equal to coverage of water connection in the home in 1980 and linear scale up to earliest measured data from JMP or 2009 global estimate                                                                       |
| Improved sanitation - Utilization of latrines or toilets + improved water source      | Joint Monitoring Programme                                                                                                                                                                                                                                                                    | Assumed coverage equal to 0% in year 1960 and linear scale up until earliest measured data. Effectiveness applies only when improved sanitation and improved water are both present.                                            |
| Rotavirus vaccine (two doses)                                                         | UNICEF vaccine coverage data                                                                                                                                                                                                                                                                  | Assumed 0% unless measured data available                                                                                                                                                                                       |
| Oral rehydration solution                                                             | Nationally representative surveys*                                                                                                                                                                                                                                                            | Assumed coverage equal to 0% in year 1980 and linear scale up until earliest measured data                                                                                                                                      |
| Vitamin A supplementation                                                             | UNICEF Vitamin A supplementation data                                                                                                                                                                                                                                                         | Assumed coverage equal to 0% in 1980. Assumed coverage equal to 0% in year 1990 and linear scale up until earliest measured data                                                                                                |
| Persistent diarrhea                                                                   | None                                                                                                                                                                                                                                                                                          | Assumed coverage equal to 0% in 2000 and 33% in all countries                                                                                                                                                                   |

\*DHS, MICS surveys and other similar surveys

## Webappendix Table 2

Average coverage/prevalence of interventions in 50 countries included in analysis, weighted by number of live births in each country

| Intervention                                | Data Assumptions                                                                                                  | 1980  | 2000  | 2015  |
|---------------------------------------------|-------------------------------------------------------------------------------------------------------------------|-------|-------|-------|
| Antibiotics for treatment of dysentery      | 1960 year of introduction and linear scale up until earliest measured data                                        | 12·33 | 18·69 | 21·06 |
| Early Initiation of Breastfeeding           | 1980 coverage equal to earliest measured                                                                          | 26·03 | 37·52 | 57·97 |
| Hand washing with soap                      | Equal to water connection in the home in 1980 and linear scale up to earliest measured data/ 2009 global estimate | 8·62  | 13·88 | 18·29 |
| Improved sanitation + improved water source | 1960 year of introduction and linear scale up until earliest measured data                                        | 27·41 | 30·13 | 41·58 |
| Rotavirus vaccine: two doses                | Assumed 0 unless measured data available                                                                          | 0·00  | 0·00  | 25·47 |
| ORS - oral rehydration solution             | 1980 year of introduction and linear scale up until earliest measured data                                        | 0·00  | 29·50 | 44·08 |
| Persistent diarrhea treatment               | 0 in 2000 and linear scale up to 33% in 2015 in all countries                                                     | 0·00  | 0·00  | 33·00 |
| Vitamin A supplementation                   | 0 in 1980· 1990 year of introduction and linear scale up until earliest measured data                             | 0·00  | 26·07 | 68·54 |
| Zinc for treatment of diarrhea              | 0 in 1980 and 0 until earliest measured data                                                                      | 0·00  | 2·41  | 12·02 |
| Global stunting (<-2 SD) rate               | Modeled stunting data used for 1980 (Majid et al)                                                                 | 57·30 | 48·67 | 36·55 |
| Severe stunting rate (0-5 months)           | Modeled stunting data used for 1980 (Majid et al)                                                                 | 9·73  | 11·21 | 8·68  |
| Severe stunting rate (6-11 months)          | Modeled stunting data used for 1980 (Majid et al)                                                                 | 14·10 | 16·08 | 12·04 |
| Severe stunting rate (12-23 months)         | Modeled stunting data used for 1980 (Majid et al)                                                                 | 29·34 | 33·37 | 24·71 |
| Severe stunting rate (24-59 months)         | Modeled stunting data used for 1980 (Majid et al)                                                                 | 35·34 | 38·74 | 28·53 |
| Global wasting (<-2 SD) rate                | 1980 prevalence equal to earliest measured                                                                        | 14·99 | 12·91 | 13·29 |
| Severe wasting (0-5 months)                 | 1980 prevalence equal to earliest measured                                                                        | 8·58  | 10·12 | 11·62 |
| Severe wasting (6-11 months)                | 1980 prevalence equal to earliest measured                                                                        | 8·04  | 9·12  | 10·23 |
| Severe wasting (12-23 months)               | 1980 prevalence equal to earliest measured                                                                        | 7·03  | 7·28  | 8·57  |
| Severe wasting (24-59 months)               | 1980 prevalence equal to earliest measured                                                                        | 3·88  | 3·87  | 5·91  |
| Exclusive breastfeeding <1 month            | 1980 prevalence equal to earliest measured                                                                        | 56·68 | 61·80 | 63·17 |
| Exclusive breastfeeding 1-5 months          | 1980 prevalence equal to earliest measured                                                                        | 35·79 | 37·24 | 40·62 |
| Predominant breastfeeding <1 month          | 1980 prevalence equal to earliest measured                                                                        | 26·02 | 31·57 | 30·38 |
| Predominant breastfeeding 1-5 months        | 1980 prevalence equal to earliest measured                                                                        | 25·52 | 37·68 | 37·69 |
| Partial breastfeeding <1 month              | 1980 prevalence equal to earliest measured                                                                        | 14·60 | 13·24 | 16·14 |
| Partial breastfeeding 1-5 months            | 1980 prevalence equal to earliest measured                                                                        | 35·29 | 38·49 | 38·97 |
| Any breastfeeding 6-11 months               | 1980 prevalence equal to earliest measured                                                                        | 95·16 | 95·15 | 93·66 |
| Any breastfeeding 12-24 months              | 1980 prevalence equal to earliest measured                                                                        | 76·71 | 79·13 | 74·87 |
| No breastfeeding 0-1 month                  | 1980 prevalence equal to earliest measured                                                                        | 3·31  | 3·37  | 3·82  |
| No breastfeeding 1-5 months                 | 1980 prevalence equal to earliest measured                                                                        | 4·05  | 2·74  | 4·18  |
| No breastfeeding 6-11 months                | 1980 prevalence equal to earliest measured                                                                        | 5·43  | 6·68  | 9·21  |
| No breastfeeding 12-24 months               | 1980 prevalence equal to earliest measured                                                                        | 23·88 | 26·64 | 34·59 |

### Webappendix Table 3

Description of the interventions and risk factors included in each universal coverage scale-up scenario.

|                                                                                                                                        | Scenario 1<br>Direct Diarrhea<br>Interventions                                                                                                                                                                       | Scenario 2<br>Direct Diarrhea Interventions<br>and Nutrition Interventions                                                                                                                                                                                      | Scenario 3<br>All interventions that affect diarrhea<br>mortality                                                                                                                                              |
|----------------------------------------------------------------------------------------------------------------------------------------|----------------------------------------------------------------------------------------------------------------------------------------------------------------------------------------------------------------------|-----------------------------------------------------------------------------------------------------------------------------------------------------------------------------------------------------------------------------------------------------------------|----------------------------------------------------------------------------------------------------------------------------------------------------------------------------------------------------------------|
| Interventions scaled up to<br>universal coverage (90%)<br><br>(For stunting, target =<br>reduction by 50%, for<br>wasting target= <5%) | <ul style="list-style-type: none"> <li>• Antibiotics for<br/>dysentery</li> <li>• Oral rehydration<br/>solution</li> <li>• Persistent diarrhea<br/>treatment</li> <li>• Rotavirus vaccine</li> <li>• Zinc</li> </ul> | <ul style="list-style-type: none"> <li>• All direct diarrhea<br/>interventions</li> <li>• Vitamin A</li> <li>• Stunting prevalence</li> <li>• Wasting prevalence</li> <li>• Breastfeeding practices</li> <li>• Early initiation of<br/>breastfeeding</li> </ul> | <ul style="list-style-type: none"> <li>• All direct diarrhea interventions</li> <li>• All nutrition interventions</li> <li>• Improved sanitation + improved water<br/>source</li> <li>• Handwashing</li> </ul> |



## Webappendix Table 4

### Number of diarrhea deaths among children under-five for 87 LMIC in 1980 and 2015

\*VAMCM: Verbal-Autopsy-based Multi-Cause Modeling<sup>7</sup>

| Rank | 1980                             |                                 |                 | 2015                             |                    |                 |
|------|----------------------------------|---------------------------------|-----------------|----------------------------------|--------------------|-----------------|
|      | Country                          | MDG Region                      | Diarrhea Deaths | Country                          | MDG Region         | Diarrhea Deaths |
| 1    | India                            | Southern Asia                   | 844436          | India                            | Southern Asia      | 117285          |
| 2    | China                            | Eastern Asia                    | 171276          | Nigeria                          | Sub-Saharan Africa | 76980           |
| 3    | Nigeria                          | Sub-Saharan Africa              | 156788          | Pakistan                         | Southern Asia      | 39484           |
| 4    | Bangladesh                       | Southern Asia                   | 150246          | Democratic Republic of the Congo | Sub-Saharan Africa | 32047           |
| 5    | Indonesia                        | South-eastern Asia              | 119114          | Angola                           | Sub-Saharan Africa | 24927           |
| 6    | Ethiopia                         | Sub-Saharan Africa              | 84475           | Ethiopia                         | Sub-Saharan Africa | 15535           |
| 7    | Pakistan                         | Southern Asia                   | 79648           | Afghanistan                      | Southern Asia      | 11723           |
| 8    | Democratic Republic of the Congo | Sub-Saharan Africa              | 55291           | Chad                             | Sub-Saharan Africa | 11360           |
| 9    | Brazil                           | Latin America and the Caribbean | 50216           | Niger                            | Sub-Saharan Africa | 9873            |
| 10   | Egypt                            | Northern Africa                 | 48334           | Sudan                            | Sub-Saharan Africa | 9536            |
| 11   | Afghanistan                      | Southern Asia                   | 37555           | Somalia                          | Sub-Saharan Africa | 8759            |
| 12   | Cambodia                         | South-eastern Asia              | 36283           | Indonesia                        | South-eastern Asia | 8551            |
| 13   | Myanmar                          | South-eastern Asia              | 33238           | Cameroon                         | Sub-Saharan Africa | 8032            |
| 14   | Mozambique                       | Sub-Saharan Africa              | 32387           | United Republic of Tanzania      | Sub-Saharan Africa | 8000            |
| 15   | United Republic of Tanzania      | Sub-Saharan Africa              | 30521           | Mali                             | Sub-Saharan Africa | 7807            |
| 16   | Nepal                            | Southern Asia                   | 29845           | Mozambique                       | Sub-Saharan Africa | 7341            |
| 17   | Angola                           | Sub-Saharan Africa              | 25914           | Bangladesh                       | Southern Asia      | 7189            |
| 18   | Mali                             | Sub-Saharan Africa              | 25269           | Uganda                           | Sub-Saharan Africa | 7001            |
| 19   | Niger                            | Sub-Saharan Africa              | 25145           | Cote d'Ivoire                    | Sub-Saharan Africa | 5697            |
| 20   | Iran (Islamic Republic of)       | Southern Asia                   | 24844           | Kenya                            | Sub-Saharan Africa | 5442            |
| 21   | Uganda                           | Sub-Saharan Africa              | 23408           | China                            | Eastern Asia       | 5291            |
| 22   | Malawi                           | Sub-Saharan Africa              | 20209           | Philippines                      | South-eastern Asia | 5075            |
| 23   | Mexico                           | Latin America and the Caribbean | 20029           | Burkina Faso                     | Sub-Saharan Africa | 4975            |
| 24   | Philippines                      | South-eastern Asia              | 19294           | Benin                            | Sub-Saharan Africa | 3996            |
| 25   | Burkina Faso                     | Sub-Saharan Africa              | 18023           | Burundi                          | Sub-Saharan Africa | 3716            |
| 26   | Yemen                            | Western Asia                    | 16989           | Zimbabwe                         | Sub-Saharan Africa | 3677            |
| 27   | Sudan                            | Sub-Saharan Africa              | 16642           | Madagascar                       | Sub-Saharan Africa | 3665            |
| 28   | Algeria                          | Northern Africa                 | 16423           | Ghana                            | Sub-Saharan Africa | 3657            |
| 29   | Morocco                          | Northern Africa                 | 15467           | South Africa                     | Sub-Saharan Africa | 3627            |
| 30   | Madagascar                       | Sub-Saharan Africa              | 15175           | Guinea                           | Sub-Saharan Africa | 3506            |
| 31   | Kenya                            | Sub-Saharan Africa              | 14906           | Zambia                           | Sub-Saharan Africa | 3469            |
| 32   | Peru                             | Latin America and the Caribbean | 14551           | Myanmar                          | South-eastern Asia | 3273            |

|    |                                       |                                 |       |                                       |                                 |      |
|----|---------------------------------------|---------------------------------|-------|---------------------------------------|---------------------------------|------|
| 33 | South Sudan                           | Sub-Saharan Africa              | 14273 | Egypt                                 | Northern Africa                 | 3271 |
| 34 | South Africa                          | Sub-Saharan Africa              | 14082 | South Sudan                           | Sub-Saharan Africa              | 3243 |
| 35 | Guinea                                | Sub-Saharan Africa              | 13593 | Malawi                                | Sub-Saharan Africa              | 3062 |
| 36 | Cameroon                              | Sub-Saharan Africa              | 13398 | Sierra Leone                          | Sub-Saharan Africa              | 2784 |
| 37 | Somalia                               | Sub-Saharan Africa              | 13198 | Yemen                                 | Western Asia                    | 2562 |
| 38 | Ghana                                 | Sub-Saharan Africa              | 12716 | Senegal                               | Sub-Saharan Africa              | 2403 |
| 39 | Cote d'Ivoire                         | Sub-Saharan Africa              | 12201 | Viet Nam                              | South-eastern Asia              | 2261 |
| 40 | Viet Nam                              | South-eastern Asia              | 11747 | Central African Republic              | Sub-Saharan Africa              | 2194 |
| 41 | Rwanda                                | Sub-Saharan Africa              | 11212 | Iraq                                  | Western Asia                    | 2119 |
| 42 | Senegal                               | Sub-Saharan Africa              | 10983 | Haiti                                 | Latin America and the Caribbean | 1860 |
| 43 | Chad                                  | Sub-Saharan Africa              | 10753 | Togo                                  | Sub-Saharan Africa              | 1636 |
| 44 | Haiti                                 | Latin America and the Caribbean | 9525  | Uzbekistan                            | Caucasus and Central Asia       | 1546 |
| 45 | Zambia                                | Sub-Saharan Africa              | 9203  | Brazil                                | Latin America and the Caribbean | 1318 |
| 46 | Bolivia (Plurinational State of)      | Latin America and the Caribbean | 8858  | Lao People's Democratic Republic      | South-eastern Asia              | 1298 |
| 47 | Sierra Leone                          | Sub-Saharan Africa              | 8730  | Algeria                               | Northern Africa                 | 1218 |
| 48 | Burundi                               | Sub-Saharan Africa              | 8502  | Mauritania                            | Sub-Saharan Africa              | 1186 |
| 49 | Benin                                 | Sub-Saharan Africa              | 7892  | Nepal                                 | Southern Asia                   | 1173 |
| 50 | Guatemala                             | Latin America and the Caribbean | 7464  | Rwanda                                | Sub-Saharan Africa              | 1033 |
| 51 | Uzbekistan                            | Caucasus and Central Asia       | 6823  | Liberia                               | Sub-Saharan Africa              | 937  |
| 52 | Zimbabwe                              | Sub-Saharan Africa              | 5808  | Guatemala                             | Latin America and the Caribbean | 931  |
| 53 | Lao People's Democratic Republic      | South-eastern Asia              | 5407  | Mexico                                | Latin America and the Caribbean | 920  |
| 54 | Democratic People's Republic of Korea | Eastern Asia                    | 5256  | Tajikistan                            | Caucasus and Central Asia       | 918  |
| 55 | Liberia                               | Sub-Saharan Africa              | 4873  | Morocco                               | Northern Africa                 | 906  |
| 56 | Togo                                  | Sub-Saharan Africa              | 4232  | Iran (Islamic Republic of)            | Southern Asia                   | 892  |
| 57 | Tajikistan                            | Caucasus and Central Asia       | 4119  | Papua New Guinea                      | Oceania                         | 810  |
| 58 | Eritrea                               | Sub-Saharan Africa              | 4059  | Eritrea                               | Sub-Saharan Africa              | 694  |
| 59 | Iraq                                  | Western Asia                    | 4020  | Cambodia                              | South-eastern Asia              | 682  |
| 60 | Kazakhstan                            | Caucasus and Central Asia       | 3923  | Bolivia (Plurinational State of)      | Latin America and the Caribbean | 579  |
| 61 | Central African Republic              | Sub-Saharan Africa              | 3595  | Democratic People's Republic of Korea | Eastern Asia                    | 563  |
| 62 | Azerbaijan                            | Caucasus and Central Asia       | 2959  | Guinea-Bissau                         | Sub-Saharan Africa              | 562  |
| 63 | Timor-Leste                           | South-eastern Asia              | 2689  | Lesotho                               | Sub-Saharan Africa              | 541  |
| 64 | Dominican Republic                    | Latin America and the Caribbean | 2545  | Congo                                 | Sub-Saharan Africa              | 519  |
| 65 | Papua New Guinea                      | Oceania                         | 2527  | Peru                                  | Latin America and the Caribbean | 514  |
| 66 | Mongolia                              | Eastern Asia                    | 2007  | Gambia                                | Sub-Saharan Africa              | 487  |

|    |                                  |                           |      |                                  |                                 |     |
|----|----------------------------------|---------------------------|------|----------------------------------|---------------------------------|-----|
| 67 | Turkmenistan                     | Caucasus and Central Asia | 1964 | Turkmenistan                     | Caucasus and Central Asia       | 484 |
| 68 | Guinea-Bissau                    | Sub-Saharan Africa        | 1823 | Azerbaijan                       | Caucasus and Central Asia       | 423 |
| 69 | Mauritania                       | Sub-Saharan Africa        | 1738 | Kazakhstan                       | Caucasus and Central Asia       | 318 |
| 70 | Congo                            | Sub-Saharan Africa        | 1661 | Namibia                          | Sub-Saharan Africa              | 299 |
| 71 | Kyrgyzstan                       | Caucasus and Central Asia | 1616 | Timor-Leste                      | South-eastern Asia              | 253 |
| 72 | Lesotho                          | Sub-Saharan Africa        | 1343 | Dominican Republic               | Latin America and the Caribbean | 231 |
| 73 | Gambia                           | Sub-Saharan Africa        | 1251 | Swaziland                        | Sub-Saharan Africa              | 230 |
| 74 | Bhutan                           | Southern Asia             | 899  | Equatorial Guinea                | Sub-Saharan Africa              | 200 |
| 75 | Namibia                          | Sub-Saharan Africa        | 827  | Kyrgyzstan                       | Caucasus and Central Asia       | 186 |
| 76 | Swaziland                        | Sub-Saharan Africa        | 800  | Gabon                            | Sub-Saharan Africa              | 160 |
| 77 | Gabon                            | Sub-Saharan Africa        | 655  | Botswana                         | Sub-Saharan Africa              | 157 |
| 78 | Botswana                         | Sub-Saharan Africa        | 553  | Comoros                          | Sub-Saharan Africa              | 142 |
| 79 | Equatorial Guinea                | Sub-Saharan Africa        | 475  | Djibouti                         | Sub-Saharan Africa              | 116 |
| 80 | Comoros                          | Sub-Saharan Africa        | 423  | Mongolia                         | Eastern Asia                    | 98  |
| 81 | Djibouti                         | Sub-Saharan Africa        | 332  | Solomon Islands                  | Oceania                         | 34  |
| 82 | Solomon Islands                  | Oceania                   | 185  | Bhutan                           | Southern Asia                   | 26  |
| 83 | Sao Tome and Principe            | Sub-Saharan Africa        | 58   | Sao Tome and Principe            | Sub-Saharan Africa              | 23  |
| 84 | Kiribati                         | Oceania                   | 44   | Kiribati                         | Oceania                         | 15  |
| 85 | Micronesia (Federated States of) | Oceania                   | 19   | Micronesia (Federated States of) | Oceania                         | 5   |
| 86 | Marshall Islands                 | Oceania                   | 11   | Marshall Islands                 | Oceania                         | 4   |
| 87 | Nauru                            | Oceania                   | 1    | Nauru                            | Oceania                         | 0   |

## Webappendix Table 5

### Comparison of change in DSMR calculated from mortality trends versus trends that calculated from *LiST* projections in 50 LMIC

| Country                          | Modeled in <i>LiST</i> |                              |                                                | Mortality Trends |                              |                                                | Percent of Reduction Explained by <i>LiST</i> | Most Recent Survey   |
|----------------------------------|------------------------|------------------------------|------------------------------------------------|------------------|------------------------------|------------------------------------------------|-----------------------------------------------|----------------------|
|                                  | 1980 DSMR              | Most recent survey year DSMR | Percent change 1980 to most recent survey year | 1980 DSMR        | Most Recent Survey Year DSMR | Percent change 1980 to most recent survey year |                                               |                      |
| Overall                          | 34.9                   | 15.7                         | 55.5                                           | 35.5             | 5.7                          | 79.9                                           | 69.5                                          |                      |
| Afghanistan                      | 54.1                   | 29.2                         | 46.1                                           | 58.3             | 11.5                         | 80.3                                           | 57.4                                          | DHS 2015             |
| Angola                           | 57.7                   | 33.2                         | 42.4                                           | 59.4             | 22.8                         | 61.5                                           | 68.9                                          | MICS 2001 + DHS 2015 |
| Bangladesh                       | 43.3                   | 7.6                          | 82.5                                           | 42.8             | 2.3                          | 94.7                                           | 87.1                                          | DHS 2014             |
| Benin                            | 44.2                   | 32.5                         | 26.5                                           | 45.4             | 11.3                         | 75.1                                           | 35.3                                          | MICS 2014            |
| Burkina Faso                     | 52.2                   | 31.1                         | 40.4                                           | 54.4             | 7.9                          | 85.5                                           | 47.3                                          | DHS 2010             |
| Burundi                          | 39.0                   | 23.0                         | 41.0                                           | 41.0             | 11.5                         | 71.9                                           | 57.0                                          | DHS 2010             |
| Cameroon                         | 32.4                   | 19.3                         | 40.2                                           | 33.2             | 10.5                         | 68.3                                           | 58.9                                          | MICS 2014            |
| Central African Republic         | 37.2                   | 25.6                         | 31.0                                           | 37.6             | 16.0                         | 57.5                                           | 53.9                                          | MICS 2010            |
| Comoros                          | 29.5                   | 22.2                         | 24.6                                           | 30.1             | 6.8                          | 77.3                                           | 31.8                                          | DHS 2012             |
| Congo                            | 21.9                   | 12.0                         | 45.3                                           | 22.1             | 3.4                          | 84.4                                           | 53.7                                          | DHS 2014             |
| Côte d'Ivoire                    | 31.0                   | 27.5                         | 11.0                                           | 31.1             | 7.9                          | 74.5                                           | 14.8                                          | DHS 2011             |
| Democratic Republic of the Congo | 44.1                   | 14.4                         | 67.4                                           | 45.6             | 10.9                         | 76.2                                           | 88.5                                          | DHS 2013             |
| Djibouti                         | 27.0                   | 17.3                         | 35.9                                           | 24.6             | 8.3                          | 66.4                                           | 54.1                                          | DHS 2006             |
| Egypt                            | 28.6                   | 14.9                         | 48.1                                           | 28.9             | 1.2                          | 95.7                                           | 50.3                                          | DHS 2014             |
| Ethiopia                         | 47.1                   | 24.4                         | 48.2                                           | 48.6             | 7.1                          | 85.4                                           | 56.4                                          | DHS 2011             |
| Gabon                            | 23.2                   | 15.9                         | 31.6                                           | 23.9             | 4.0                          | 83.3                                           | 37.9                                          | DHS 2012             |
| Gambia                           | 38.6                   | 20.1                         | 48.0                                           | 40.8             | 7.6                          | 81.4                                           | 59.0                                          | DHS 2013             |
| Ghana                            | 26.8                   | 8.7                          | 67.5                                           | 27.0             | 4.3                          | 84.0                                           | 80.4                                          | DHS 2014             |
| Guatemala                        | 24.2                   | 10.1                         | 58.4                                           | 24.4             | 2.3                          | 90.8                                           | 64.3                                          | DHS 2014             |
| Guinea-Bissau                    | 44.3                   | 13.2                         | 70.2                                           | 46.8             | 9.4                          | 79.9                                           | 87.9                                          | DHS 2014             |
| Haiti                            | 39.6                   | 18.4                         | 53.6                                           | 41.0             | 8.7                          | 78.8                                           | 68.0                                          | DHS 2012             |
| India                            | 33.2                   | 14.2                         | 57.3                                           | 33.9             | 4.7                          | 86.2                                           | 66.5                                          | NFHS 2015            |
| Iraq                             | 7.6                    | 5.2                          | 31.9                                           | 7.5              | 2.2                          | 71.0                                           | 44.9                                          | MICS 2011            |
| Kenya                            | 18.6                   | 5.9                          | 68.1                                           | 18.9             | 3.9                          | 79.5                                           | 85.7                                          | DHS 2014             |
| Kyrgyzstan                       | 14.9                   | 7.8                          | 47.5                                           | 15.4             | 1.2                          | 92.3                                           | 51.5                                          | MICS 2014            |
| Lao People's Democratic Republic | 38.5                   | 18.5                         | 51.8                                           | 38.7             | 9.1                          | 76.5                                           | 67.7                                          | MICS 2011            |
| Lesotho                          | 32.0                   | 11.6                         | 63.8                                           | 25.4             | 9.1                          | 64.4                                           | 99.1                                          | DHS 2014             |
| Liberia                          | 51.9                   | 18.8                         | 63.8                                           | 53.5             | 7.1                          | 86.7                                           | 73.6                                          | DHS 2013             |
| Malawi                           | 60.2                   | 14.9                         | 75.3                                           | 62.6             | 4.9                          | 92.2                                           | 81.7                                          | DHS 2015             |
| Mali                             | 68.9                   | 36.1                         | 47.6                                           | 72.2             | 10.8                         | 85.1                                           | 55.9                                          | MICS 2015            |
| Mauritania                       | 26.2                   | 9.8                          | 62.5                                           | 26.6             | 9.0                          | 66.1                                           | 94.6                                          | MICS 2015            |
| Mozambique                       | 56.4                   | 25.7                         | 54.5                                           | 58.0             | 8.9                          | 84.7                                           | 64.3                                          | DHS 2011             |
| Nepal                            | 47.3                   | 24.1                         | 49.1                                           | 48.4             | 2.3                          | 95.2                                           | 51.6                                          | MICS 2014            |
| Niger                            | 73.1                   | 48.8                         | 33.2                                           | 77.4             | 13.6                         | 82.4                                           | 40.3                                          | DHS 2012             |

|                             |      |      |      |      |      |      |       |           |
|-----------------------------|------|------|------|------|------|------|-------|-----------|
| Nigeria                     | 44·8 | 30·8 | 31·3 | 46·3 | 12·6 | 72·7 | 43·1  | DHS 2013  |
| Pakistan                    | 24·3 | 12·5 | 48·6 | 24·4 | 8·2  | 66·5 | 73·1  | DHS 2012  |
| Peru                        | 23·7 | 10·6 | 55·4 | 23·3 | 0·8  | 96·4 | 57·5  | DHS 2014  |
| Rwanda                      | 40·5 | 12·8 | 68·4 | 41·5 | 3·4  | 91·7 | 74·6  | DHS 2014  |
| São Tomé and Príncipe       | 17·3 | 4·2  | 75·8 | 15·3 | 3·9  | 74·8 | 101·3 | MICS 2014 |
| Senegal                     | 39·7 | 17·7 | 55·4 | 41·0 | 4·1  | 89·9 | 61·6  | DHS 2015  |
| Sierra Leone                | 59·1 | 16·1 | 72·8 | 61·4 | 15·4 | 74·9 | 97·2  | DHS 2013  |
| Swaziland                   | 27·3 | 7·1  | 74·1 | 28·0 | 6·7  | 76·0 | 97·5  | MICS 2014 |
| Tajikistan                  | 25·8 | 10·2 | 60·7 | 27·0 | 3·9  | 85·4 | 71·1  | DHS 2013  |
| Togo                        | 32·6 | 16·5 | 49·3 | 33·0 | 7·1  | 78·5 | 62·8  | DHS 2013  |
| Turkménistan                | 19·9 | 9·4  | 52·5 | 20·0 | 4·2  | 78·8 | 66·6  | MICS 2015 |
| Uganda                      | 37·9 | 19·5 | 48·4 | 38·3 | 5·8  | 84·9 | 57·0  | DHS 2011  |
| United Republic of Tanzania | 34·9 | 11·1 | 68·2 | 35·3 | 3·9  | 89·0 | 76·6  | DHS 2015  |
| Viet Nam                    | 6·8  | 2·1  | 68·9 | 6·8  | 1·5  | 77·7 | 88·7  | MICS 2014 |
| Zambia                      | 32·2 | 11·6 | 63·8 | 32·6 | 6·8  | 79·1 | 80·7  | DHS 2013  |
| Zimbabwe                    | 17·4 | 8·7  | 50·0 | 17·3 | 6·7  | 61·1 | 81·8  | DHS 2015  |

## Webappendix Table 6

The impact on diarrhea-specific mortality (DSMR) if increased coverage of different packages of interventions is achieved by 2030.

| Country                  | 2015<br>DSMR | 2030       |                   |            |                   |            |                   |
|--------------------------|--------------|------------|-------------------|------------|-------------------|------------|-------------------|
|                          |              | Scenario 1 |                   | Scenario 2 |                   | Scenario 3 |                   |
|                          |              | DSMR       | Percent Reduction | DSMR       | Percent Reduction | DSMR       | Percent Reduction |
| Global                   | 6.02         | 1.56       | 74.06             | 0.66       | 89.09%            | 0.43       | 92.84%            |
| Afghanistan              | 11.18        | 2.74       | 75.48             | 1.03       | 90.81%            | 0.66       | 94.06%            |
| Angola                   | 23.13        | 5.11       | 77.92             | 2.29       | 90.11             | 1.56       | 93.24             |
| Bangladesh               | 2.30         | 0.98       | 57.52             | 0.45       | 80.31             | 0.32       | 86.00             |
| Benin                    | 10.47        | 2.55       | 75.64             | 0.90       | 91.44             | 0.56       | 94.66             |
| Burkina Faso             | 7.14         | 1.60       | 77.53             | 0.61       | 91.41             | 0.38       | 94.64             |
| Burundi                  | 7.90         | 1.96       | 75.13             | 1.16       | 85.34             | 0.79       | 90.01             |
| Cameroon                 | 9.79         | 2.07       | 78.81             | 1.16       | 88.12             | 0.79       | 91.96             |
| Central African Republic | 14.08        | 2.72       | 80.67             | 1.20       | 91.49             | 0.75       | 94.68             |
| Comoros                  | 5.56         | 1.24       | 77.78             | 0.49       | 91.11             | 0.32       | 94.29             |
| Congo                    | 3.54         | 0.81       | 77.03             | 0.43       | 87.76             | 0.27       | 92.38             |
| Côte d'Ivoire            | 6.94         | 1.38       | 80.11             | 0.73       | 89.42             | 0.46       | 93.36             |
| DRC                      | 10.20        | 2.40       | 76.43             | 1.17       | 88.55             | 0.75       | 92.68             |
| Djibouti                 | 5.38         | 1.72       | 68.13             | 0.39       | 92.71             | 0.25       | 95.45             |
| Egypt                    | 1.22         | 0.22       | 81.64             | 0.10       | 91.91             | 0.08       | 93.15             |
| Ethiopia                 | 4.89         | 1.17       | 76.12             | 0.57       | 88.27             | 0.37       | 92.51             |
| Gabon                    | 3.05         | 0.62       | 79.59             | 0.31       | 89.80             | 0.21       | 93.20             |
| Gambia                   | 6.09         | 1.81       | 70.20             | 0.76       | 87.54             | 0.54       | 91.15             |
| Ghana                    | 4.14         | 1.13       | 72.65             | 0.67       | 83.83             | 0.39       | 90.48             |
| Guatemala                | 2.10         | 0.58       | 72.45             | 0.34       | 83.86             | 0.26       | 87.81             |
| Guinea-Bissau            | 9.20         | 2.12       | 77.01             | 1.35       | 85.37             | 0.84       | 90.84             |
| Haiti                    | 7.05         | 1.83       | 73.97             | 1.05       | 85.08             | 0.67       | 90.52             |
| India                    | 4.66         | 1.26       | 73.04             | 0.41       | 91.22             | 0.27       | 94.18             |
| Iraq                     | 1.73         | 0.50       | 70.97             | 0.27       | 84.43             | 0.17       | 90.21             |
| Kenya                    | 3.46         | 0.94       | 72.91             | 0.54       | 84.47             | 0.36       | 89.69             |
| Kyrgyzstan               | 1.12         | 0.26       | 76.44             | 0.16       | 85.64             | 0.13       | 88.38             |

|                             |       |      |       |      |       |      |       |
|-----------------------------|-------|------|-------|------|-------|------|-------|
| Laos                        | 7.48  | 1.75 | 76.64 | 0.98 | 86.96 | 0.72 | 90.40 |
| Lesotho                     | 6.91  | 1.82 | 73.70 | 1.13 | 83.69 | 0.72 | 89.53 |
| Liberia                     | 6.13  | 1.73 | 71.69 | 0.94 | 84.73 | 0.58 | 90.56 |
| Malawi                      | 4.29  | 1.50 | 64.95 | 1.18 | 72.56 | 0.77 | 81.97 |
| Mali                        | 10.62 | 2.39 | 77.53 | 1.30 | 87.81 | 0.82 | 92.30 |
| Mauritania                  | 9.00  | 2.34 | 73.97 | 0.95 | 89.49 | 0.63 | 93.01 |
| Mozambique                  | 6.19  | 1.67 | 73.09 | 0.88 | 85.79 | 0.55 | 91.13 |
| Nepal                       | 2.10  | 0.52 | 75.38 | 0.26 | 87.50 | 0.18 | 91.64 |
| Niger                       | 10.29 | 2.52 | 75.47 | 0.90 | 91.25 | 0.54 | 94.70 |
| Nigeria                     | 11.22 | 2.44 | 78.22 | 0.79 | 92.96 | 0.51 | 95.49 |
| Pakistan                    | 7.44  | 1.74 | 76.57 | 0.78 | 89.57 | 0.56 | 92.51 |
| Peru                        | 0.83  | 0.21 | 75.13 | 0.13 | 83.78 | 0.11 | 87.24 |
| Rwanda                      | 2.71  | 0.61 | 77.31 | 0.44 | 83.74 | 0.32 | 88.33 |
| São Tomé and Príncipe       | 3.63  | 0.88 | 75.65 | 0.56 | 84.65 | 0.33 | 90.77 |
| Senegal                     | 4.13  | 1.05 | 74.65 | 0.57 | 86.1  | 0.40 | 90.42 |
| Sierra Leone                | 12.44 | 6.43 | 48.35 | 2.59 | 79.16 | 1.58 | 87.28 |
| Swaziland                   | 3.72  | 1.93 | 48.14 | 1.07 | 71.33 | 0.75 | 79.93 |
| Tajikistan                  | 3.52  | 1.13 | 67.93 | 0.49 | 86.16 | 0.37 | 89.50 |
| Togo                        | 6.42  | 1.35 | 78.95 | 0.78 | 87.89 | 0.47 | 92.69 |
| Turkmenistan                | 4.18  | 1.12 | 73.27 | 0.69 | 83.60 | 0.41 | 90.28 |
| Uganda                      | 4.03  | 0.97 | 76.06 | 0.56 | 86.21 | 0.34 | 91.52 |
| United Republic of Tanzania | 3.59  | 0.97 | 73.04 | 0.59 | 83.45 | 0.36 | 89.95 |
| Vietnam                     | 1.42  | 0.30 | 78.67 | 0.17 | 87.79 | 0.13 | 90.72 |
| Zambia                      | 4.63  | 1.48 | 67.99 | 0.86 | 81.53 | 0.58 | 87.57 |
| Zimbabwe                    | 5.88  | 1.47 | 75.05 | 0.78 | 86.80 | 0.51 | 91.30 |

## Webappendix Table 7

The percent of child lives saved in 2030 attributable to each intervention in the three scale-up scenarios

| Intervention                            | Percent Attributable |            |            |
|-----------------------------------------|----------------------|------------|------------|
|                                         | Scenario 1           | Scenario 2 | Scenario 3 |
| Antibiotics for dysentery               | 7.3                  | 3.2        | 2.0        |
| ORS                                     | 51.6                 | 22.8       | 14.4       |
| Persistent diarrhea treatment           | 12.1                 | 5.3        | 3.3        |
| Rotavirus vaccine                       | 12.0                 | 8.6        | 6.8        |
| Zinc for treatment of diarrhea          | 16.9                 | 7.3        | 4.6        |
| Stunting prevalence                     | 0.00                 | 21.6       | 17.1       |
| Wasting prevalence                      | 0.00                 | 10.1       | 6.4        |
| Early initiation of breastfeeding       | 0.00                 | 0.15       | 0.1        |
| Age-appropriate breastfeeding practices | 0.00                 | 17.3       | 13.5       |
| Vitamin A supplementation               | 0.00                 | 3.6        | 2.8        |
| Hand washing with soap                  | 0.00                 | 0.00       | 15.7       |
| Improved sanitation and water           | 0.00                 | 0.00       | 13.1       |



## Webappendix Table 8

### Countries that would reduce diarrhea mortality to <1 death per 1000 live births in three scenarios

| Direct Diarrhea             | Direct Diarrhea Plus Nutrition | Direct Diarrhea Plus Nutrition and WASH | Unable to reduce DSMR to <1 in an scenario |
|-----------------------------|--------------------------------|-----------------------------------------|--------------------------------------------|
| Bangladesh                  | Benin                          | Afghanistan                             | Angola                                     |
| Congo                       | Burkina Faso                   | Burundi                                 | Sierra Leone                               |
| Egypt                       | Comoros                        | Cameroon                                |                                            |
| Gabon                       | Côte d'Ivoire                  | Central African Republic                |                                            |
| Guatemala                   | Djibouti                       | Democratic Republic of the Congo        |                                            |
| Iraq                        | Ethiopia                       | Guinea-Bissau                           |                                            |
| Kenya                       | Gambia                         | Haiti                                   |                                            |
| Kyrgyzstan                  | Ghana                          | Lesotho                                 |                                            |
| Nepal                       | India                          | Malawi                                  |                                            |
| Peru                        | Laos                           | Mali                                    |                                            |
| Rwanda                      | Liberia                        | Swaziland                               |                                            |
| São Tomé and Príncipe       | Mauritania                     |                                         |                                            |
| Uganda                      | Mozambique                     |                                         |                                            |
| United Republic of Tanzania | Niger                          |                                         |                                            |
| Vietnam                     | Nigeria                        |                                         |                                            |
|                             | Pakistan                       |                                         |                                            |
|                             | Senegal                        |                                         |                                            |
|                             | Tajikistan                     |                                         |                                            |
|                             | Togo                           |                                         |                                            |
|                             | Turkmenistan                   |                                         |                                            |
|                             | Zambia                         |                                         |                                            |
|                             | Zimbabwe                       |                                         |                                            |
